# Supplementary material for: Diurnal rhythms in gene expression in the prefrontal cortex in schizophrenia
Source: PubMed Central journal article supplement (PMC6689017; doi:10.1038/s41467-019-11335-1), 2019-08-09
Supplement: 41467_2019_11335_MOESM2_ESM.pdf [file 41467_2019_11335_MOESM2_ESM.pdf]

## **Description of Additional Supplementary Files**

File Name: Supplementary Data 1

Description: Cohort of control subjects from University of Pittsburgh and Mt. Sinai School of Medicine.

File Name: Supplementary Data 2

Description: Rhythmic genes in the dlPFC from human postmortem brains.

File Name: Supplementary Data 3

Description: Matched cohort between control subjects and subjects with schizophrenia for rhythmic analyses.

File Name: Supplementary Data 4

Description: Rhythmic genes in dlPFC in control subjects and subjects with schizophrenia.

File Name: Supplementary Data 5

Description: Overlap of rhythmic genes between control subjects and subjects with schizophrenia.

File Name: Supplementary Data 6

Description: Genes which lost or gained rhythmicity between control subjects and subjects with schizophrenia.

File Name: Supplementary Data 7

Description: Mitochondrial related genes.

File Name: Supplementary Data 8

Description: Comparison of genes between control subjects and subjects with schizophrenia who died during the day.

File Name: Supplementary Data 9

Description: Comparison of genes between control subjects and subjects with schizophrenia who died during the night.

File Name: Supplementary Data 10

Description: Differentially expressed genes during the day ( $P < 0.05$ ) with variance shown for each covariate.

File Name: Supplementary Data 11

Description: Differentially expressed genes during the night ( $P < 0.05$ ) with variance shown for each covariate.
